# Supplementary material for: Introgression maintains the genetic integrity of the mating-type determining chromosome of the fungus Neurospora tetrasperma
Source: HighWire-hosted journal article supplement (doi:10.1101/gr.197244.115), 2016-02-18
Supplement: Supplemental_Tables.pdf [file Supplemental_Tables.pdf]

**Supplementary Table 1.** *Neurospora* strains sequenced in this study and the mean sequencing depth across the genome.

| Strain Number <sup>1</sup> |                              |                       |                             |                      |                                 |    |
|----------------------------|------------------------------|-----------------------|-----------------------------|----------------------|---------------------------------|----|
| Hetero-<br>karyon          | Homo-<br>karyon <sup>2</sup> | Location <sup>3</sup> | Mating<br>type <sup>4</sup> | Lineage <sup>5</sup> | Depth <sup>6</sup><br>2509 2508 |    |
| <i>N. tetrasperma</i>      |                              |                       |                             |                      |                                 |    |
| RLM131                     | FGSC7585                     | Coba, Mexico          | A                           | L4                   | 26                              | 25 |
|                            | FGSC7586                     |                       | a                           | L4                   | 26                              | 25 |
| P4492                      | FGSC9033                     | Franklin, LA, USA     | A                           | L1                   | 45                              | 43 |
|                            | FGSC9034                     |                       | a                           | L1                   | 28                              | 26 |
| FGSC965                    | 965A/FGSC10751               | Liberia               | A                           | L9                   | 45                              | 42 |
|                            | 965a/FGSC10752               |                       | a                           | L9                   | 25                              | 24 |
| UK26                       | CJ01/FGSC10703               | Surrey, England       | A                           | L10                  | 29                              | 27 |
|                            | CJ02/FGSC10704 <sup>H</sup>  |                       | a                           | L10                  | 29                              | 27 |
| UK12                       | CJ03/FGSC10705               | Surrey, England       | A                           | L10                  | 28                              | 27 |
|                            | CJ04/FGSC10706               |                       | a                           | L10                  | 28                              | 25 |
| UK33                       | CJ05/FGSC10707               | Surrey, England       | A                           | L10                  | 28                              | 27 |
|                            | CJ06/FGSC10708               |                       | a                           | L10                  | 29                              | 26 |
| UK43                       | CJ07/FGSC709 <sup>H</sup>    | Surrey, England       | A                           | L10                  | 27                              | 26 |
|                            | CJ08/FGSC710                 |                       | a                           | L10                  | 30                              | 27 |
| UK23                       | CJ09/FGSC711                 | Surrey, England       | A                           | L10                  | 27                              | 26 |
|                            | CJ10/FGSC712                 |                       | a                           | L10                  | 29                              | 27 |
| UK1                        | CJ11/FGSC10713 <sup>H</sup>  | Surrey, England       | A                           | L10                  | 28                              | 27 |
|                            | CJ12/FGSC10714 <sup>H</sup>  |                       | a                           | L10                  | 29                              | 27 |
| UK41                       | CJ13/FGSC10715               | Surrey, England       | A                           | L10                  | 28                              | 26 |
|                            | CJ14/FGSC10716               |                       | a                           | L10                  | 29                              | 27 |
| UK54                       | CJ15/FGSC10717               | Surrey, England       | A                           | L10                  | 27                              | 26 |
|                            | CJ16/FGSC718                 |                       | a                           | L10                  | 28                              | 26 |
| UK77                       | CJ17/FGSC719 <sup>H</sup>    | Surrey, England       | A+a                         | L10                  | 28                              | 27 |
|                            | CJ18/FGSC720 <sup>H</sup>    |                       | a                           | L10                  | 29                              | 27 |
| UK65                       | CJ19/FGSC721                 | Surrey, England       | A                           | L10                  | 28                              | 27 |
|                            | CJ20/FGSC722                 |                       | a                           | L10                  | 29                              | 27 |
| UK86                       | CJ21/FGSC10723 <sup>H</sup>  | Surrey, England       | A+a                         | L10                  | 28                              | 26 |
|                            | CJ22/FGSC10724               |                       | a                           | L10                  | 29                              | 27 |
| UK100                      | CJ23/FGSC10725               | Surrey, England       | A                           | L10                  | 29                              | 27 |
|                            | CJ24/FGSC10726               |                       | a                           | L10                  | 29                              | 27 |
| P3358                      | CJ25/FGSC10727               | Pirongia, NZ          | A                           | L5                   | 29                              | 30 |

|       |                              |                    |     |    |    |    |
|-------|------------------------------|--------------------|-----|----|----|----|
|       | CJ26/FGSC10728               |                    | a   | L5 | 31 | 29 |
| P2252 | CJ27/FGSC10729               | Dargaville, NZ     | A   | L5 | 29 | 30 |
|       | CJ28/FGSC10730               |                    | a   | L5 | 31 | 29 |
| P2331 | CJ29/FGSC10731               | Te Hana, NZ        | A   | L5 | 30 | 31 |
|       | CJ30/FGSC10732 <sup>C2</sup> |                    | a   | L5 | 31 | 29 |
| P3359 | CJ31/FGSC10733 <sup>H</sup>  | Pirongia, NZ       | A+a | L5 | 29 | 30 |
|       | CJ32/FGSC10734               |                    | a   | L5 | 31 | 28 |
| P2317 | CJ33/FGSC10735               | Brookby, NZ        | A   | L5 | 29 | 30 |
|       | CJ34/FGSC10736               |                    | a   | L5 | 31 | 29 |
| P2275 | CJ35/FGSC10737 <sup>C1</sup> | Herekino, NZ       | a   | L5 | 31 | 28 |
|       | CJ36/FGSC10738               |                    | a   | L5 | 31 | 29 |
| P2284 | CJ37/FGSC10739 <sup>C2</sup> | Omapere, NZ        | A   | L5 | 30 | 31 |
|       | CJ38/FGSC10740               |                    | a   | L5 | 31 | 29 |
| P2253 | CJ39/FGSC10741 <sup>C2</sup> | Dargaville, NZ     | A   | L5 | 30 | 31 |
|       | CJ40/FGSC10742               |                    | a   | L5 | 31 | 28 |
| P2299 | CJ41/FGSC10743               | Waitakere, NZ      | A   | L5 | 30 | 30 |
|       | CJ42/FGSC10744               |                    | a   | L5 | 30 | 28 |
| P2273 | CJ43/FGSC10745               | Herekino, NZ       | A   | L5 | 30 | 31 |
|       | CJ44/FGSC10746               |                    | a   | L5 | 31 | 29 |
| P2356 | CJ45                         | Ahipara, NZ        | A   | L5 | 29 | 30 |
|       | CJ46                         |                    | a   | L5 | 30 | 27 |
| P2357 | CJ47/FGSC10747               | Ahipara, NZ        | A   | L5 | 28 | 29 |
|       | CJ48/FGSC10748 <sup>C1</sup> |                    | A   | L5 | 27 | 28 |
| P2361 | CJ49/P4371                   | Ahipara, NZ        | A   | L5 | 28 | 29 |
|       | CJ50/P4372                   |                    | a   | L5 | 30 | 27 |
| P2294 | CJ51/FGSC10749               | Mt. Albert, NZ     | A   | L5 | 30 | 31 |
| P2303 | CJ52/FGSC10750 <sup>H</sup>  | Cornwallis Bch, NZ | A+a | L5 | 31 | 29 |
| P4495 | CJ55/FGSC9024                | Franklin, LA, USA  | A   | L1 | 33 | 31 |
|       | CJ56/FGSC9025                |                    | a   | L1 | 31 | 30 |
| P4488 | CJ57/FGSC9026                | Franklin, LA, USA  | A   | L8 | 34 | 32 |
|       | CJ58/FGSC9027                |                    | a   | L8 | 30 | 28 |
| P4466 | CJ59/FGSC9028                | Franklin, LA, USA  | A   | L8 | 30 | 29 |
|       | CJ60/FGSC9029                |                    | a   | L8 | 34 | 32 |
| P4460 | CJ61/FGSC9030                | Franklin, LA, USA  | A   | L8 | 29 | 28 |
|       | CJ62/FGSC9031                |                    | a   | L8 | 31 | 30 |
| J3    | CJ63/FGSC9035                | Franklin, LA, USA  | A   | L8 | 33 | 32 |
|       | CJ64/FGSC9036                |                    | a   | L8 | 31 | 30 |
| P4461 | CJ65/FGSC9037 <sup>C2</sup>  | Franklin, LA, USA  | A   | L1 | 35 | 33 |
|       | CJ66/FGSC9038 <sup>C2</sup>  |                    | a   | L1 | 31 | 30 |
| J14   | CJ67/FGSC9039                | Franklin, LA, USA  | A   | L8 | 34 | 33 |

|         |                            |                   |     |    |    |    |
|---------|----------------------------|-------------------|-----|----|----|----|
|         | CJ68/FGSC9040              |                   | a   | L8 | 30 | 28 |
| P4477   | CJ69/FGSC9042              | Franklin, LA, USA | A   | L7 | 34 | 33 |
|         | CJ70/FGSC9041              |                   | a   | L7 | 33 | 31 |
| J8      | CJ71/FGSC9043              | Franklin, LA, USA | A   | L8 | 33 | 32 |
|         | CJ72/FGSC9044              |                   | a   | L8 | 35 | 33 |
| J2      | CJ73/FGSC9045              | Franklin, LA, USA | A   | L7 | 29 | 27 |
|         | CJ74/FGSC9046              |                   | a   | L7 | 32 | 30 |
| J9      | CJ75/FGSC9047              | Franklin, LA, USA | A   | L8 | 31 | 29 |
|         | CJ76/FGSC9048              |                   | a   | L8 | 30 | 29 |
| J13     | CJ77/FGSC9049              | Franklin, LA, USA | A   | L8 | 32 | 30 |
|         | CJ78/FGSC9050              |                   | a   | L8 | 33 | 31 |
| P4379   | CJ79/FGSC9051              | Welsh, LA, USA    | A   | L8 | 32 | 30 |
| P4380   | CJ80/FGSC9052              |                   | a   | L8 | 31 | 30 |
| P4381   | CJ81/FGSC9053              | Welsh, LA, USA    | A   | L7 | 29 | 28 |
| P4382   | CJ82/FGSC9054              |                   | a   | L7 | 28 | 27 |
| P470    | CJ83/FGSC2501              | Empire, LA, USA   | A   | L7 | 30 | 28 |
| unknown | CJ84/FGSC2502              |                   | a   | L7 | 33 | 31 |
| P505    | CJ85/FGSC2503              | Welsh, LA, USA    | A   | L8 | 33 | 31 |
|         | CJ86/FGSC2504              |                   | a   | L8 | 32 | 30 |
| P0654   | CJ87/FGSC2505 <sup>H</sup> | Perkins, LA, USA  | A+a | L8 | 32 | 30 |
| P0655   | CJ88/FGSC2506 <sup>H</sup> |                   | A+a | L8 | 30 | 29 |

---

***N. sitophila***

|    |          |        |   |    |    |    |
|----|----------|--------|---|----|----|----|
| NA | FGSC1135 | Panama | A | NA | 32 | 30 |
|----|----------|--------|---|----|----|----|

---

***N. hispaniola***

|    |          |                            |   |    |    |    |
|----|----------|----------------------------|---|----|----|----|
| NA | FGSC8817 | Carrefour Dufort,<br>Haiti | A | NA | 31 | 30 |
|----|----------|----------------------------|---|----|----|----|

---

1. Strain Names are Fungal Genetic Stock Center (FGSC), Perkins collection (P), Jacobson collection (J), RL Metzenberg (RLM) and UK/CJ numbers are from Corcoran et al (2012).
2. Genomes excluded from analyses due to “H”: heterokaryosis, “C”: identity (clonality) with other strain originating from the same heterokaryon “C1” or a different heterokaryon “C2.”
3. Abbreviations: Louisiana (LA); New Zealand (NZ).
4. Mating type is either *mat A* (A), *mat a* (a) or heterokaryotic (A+a).
5. Lineage to which the *N. tetrasperma* strains are assigned, based on Menkis *et al.* (2009) and Corcoran *et al.* (2014).

6. *Neurospora tetrasperma* has two reference genomes from L6. The FGSC 2508 (*mat A*) and 2509 (*mat a*) homokarons were isolated from P581 (see Ellison et al. (2011), for details). Sequencing depths were calculated using the samtools depth command.

**Supplementary Table 2.** Comparison of genetic variation in *N. tetrasperma* and *N. crassa*<sup>1</sup>. Nucleotide diversity ( $\pi$ ) of autosomes, and distance over which linkage disequilibrium (LD) decays to half its maximum.

| Population                   | $\pi$  | LD decay (kb) |
|------------------------------|--------|---------------|
| L10 (UK)                     | 0.0050 | >500          |
| L5 (NZ)                      | 0.0022 | 11            |
| L8 (LA)                      | 0.0008 | 31            |
| <i>N. crassa</i> (Louisiana) | 0.0024 | 0.70          |
| <i>N. crassa</i> (Caribbean) | 0.0023 | 0.85          |

<sup>1</sup>Data for *N. crassa* Ellison *et al.* 2011a.

**Supplementary Table 3.** Mean nucleotide diversity at synonymous sites ( $\pi_s$ ) across genes in recombining regions (R) and regions of suppressed recombination (SR) of the genome in Lineages of *N. tetrasperma*.

| <b>Lineage</b> | <b>R</b> | <b>SR (<i>mat A</i>)</b> | <b>SR (<i>mat a</i>)</b> | <b>R/SR<sup>1</sup> (<i>mat A</i>)</b> | <b>R/SR<sup>1</sup> (<i>mat a</i>)</b> |
|----------------|----------|--------------------------|--------------------------|----------------------------------------|----------------------------------------|
| L10 (UK)       | 0.01061  | 0.00007                  | 0.00008                  | 75.8                                   | 66.7                                   |
| L5 (NZ)        | 0.00424  | 0.00065                  | 0.00043                  | 3.3                                    | 4.9                                    |
| L8 (LA)        | 0.00194  | 0.00078                  | 0.00004                  | 1.24                                   | 24.25                                  |

<sup>1</sup>These ratios are divided by a factor of two to account for half the effective population size in the SR compared to R.

**Supplementary Table 4.** Divergence between the *N. tetrasperma* lineages and the three heterothallic species within the recombining regions of the genome (R) and regions of suppressed recombination on the *mat* chromosome. Divergence values in SR regions that are more extreme than expected under the isolation model are highlighted in bold.

| Lineage | Region <sup>1</sup> | <i>N. crassa</i> |                      | <i>N. hispaniola</i> |          | <i>N. sitophila</i> |         |
|---------|---------------------|------------------|----------------------|----------------------|----------|---------------------|---------|
|         |                     | Median           | p-value <sup>2</sup> | Median               | p-value  | Median              | p-value |
| L1      | R                   | 0.0434           | n/a                  | 0.0235               | n/a      | 0.0264              | n/a     |
| L1      | SRa                 | 0.0353           | 0.4271               | 0.0197               | 0.48298  | 0.0248              | 0.53406 |
| L1      | SRA                 | 0.0363           | 0.4469               | 0.0208               | 0.51916  | 0.0211              | 0.37128 |
| L4      | R                   | 0.0436           | n/a                  | 0.0225               | n/a      | 0.0267              | n/a     |
| L4      | SRa                 | 0.0369           | 0.4586               | <b>0.0058</b>        | <b>0</b> | 0.0269              | 0.39266 |
| L4      | SRA                 | 0.0374           | 0.4685               | 0.0205               | 0.50928  | 0.0227              | 0.50928 |
| L5      | R                   | 0.0459           | n/a                  | 0.0248               | n/a      | 0.0274              | n/a     |
| L5      | SRa                 | 0.0387           | 0.49224              | 0.0216               | 0.54458  | 0.0220              | 0.4151  |
| L5      | SRA                 | 0.0362           | 0.55482              | 0.0302               | 0.2575   | 0.0352              | 0.19812 |
| L6      | R                   | 0.0476           | n/a                  | 0.0252               | n/a      | 0.0278              | n/a     |
| L6      | SRa                 | 0.0389           | 0.50424              | 0.0220               | 0.5567   | 0.0225              | 0.15882 |
| L6      | SRA                 | 0.0400           | 0.4853               | 0.0320               | 0.22828  | 0.0379              | 0.43722 |
| L7      | R                   | 0.0416           | n/a                  | 0.0216               | n/a      | 0.0259              | n/a     |
| L7      | SRa                 | 0.0345           | 0.40986              | <b>0.0074</b>        | <b>0</b> | 0.0247              | 0.52916 |
| L7      | SRA                 | 0.0344           | 0.41134              | 0.0186               | 0.44436  | 0.0236              | 0.48504 |
| L8      | R                   | 0.0423           | n/a                  | 0.0222               | n/a      | 0.0257              | n/a     |
| L8      | SRa                 | 0.0360           | 0.44184              | 0.0208               | 0.51916  | 0.0210              | 0.36798 |
| L8      | SRA                 | 0.0357           | 0.43556              | 0.0192               | 0.46582  | 0.0233              | 0.47148 |
| L9      | R                   | 0.0444           | n/a                  | 0.0239               | n/a      | 0.0268              | n/a     |
| L9      | SRa                 | 0.0275           | 0.25022              | 0.0300               | 0.26102  | 0.0342              | 0.2156  |
| L9      | SRA                 | 0.0370           | 0.46088              | 0.0216               | 0.4564   | 0.0222              | 0.4242  |
| L10     | R                   | 0.0440           | n/a                  | 0.0234               | n/a      | 0.0272              | n/a     |
| L10     | SRa                 | 0.0377           | 0.47318              | 0.0213               | 0.5345   | 0.0211              | 0.37128 |
| L10     | SRA                 | 0.0369           | 0.4586               | <b>0.0047</b>        | <b>0</b> | 0.0280              | 0.35892 |

<sup>1</sup>The R region is composed of pseudoautosomal regions (PAR) and autosomes.

<sup>2</sup> This is the proportion of simulated sequence divergence values that were as extreme or more extreme than the observed median divergence to a heterothallic species (50000 replicate simulations of 25kb a locus). Parameters used as input for the MCcoal simulations were taken from the estimates produced with the M0 model in 3S run on autosomal intergenic regions (see methods for further details).

<sup>3</sup> n/a is not applicable.

**Supplementary Table 5.** Patterson's *D*-statistic (*D*), which measures excess of ABBA sites over BABA sites or vice versa, for the comparison of strain 9033 (P1) of L1 *N. tetrasperma* (L1 column), and a strain (P2) from each of the other seven lineages (L2 column) of *N. tetrasperma*, 8817 from *N. hispaniola* (P3) and *N. discreta* as the outgroups (O). A significantly positive *D*-statistic supports introgression from *N. hispaniola* and P2.

| L1 | L2  | P1   | P2    | P3   | O    | D       | Standard Error | Z-score | p-value  |
|----|-----|------|-------|------|------|---------|----------------|---------|----------|
| L1 | L6  | 9033 | 2508  | 8817 | Ndis | 0.0352  | 0.0126         | 2.8010  | 3.77E-01 |
| L1 | L6  | 9033 | 2509  | 8817 | Ndis | 0.0383  | 0.0127         | 3.0243  | 1.84E-01 |
| L1 | L4  | 9033 | 7585  | 8817 | Ndis | 0.0934  | 0.0165         | 5.6636  | 1.10E-06 |
| L1 | L4  | 9033 | 7586  | 8817 | Ndis | 0.0942  | 0.0166         | 5.6708  | 1.05E-06 |
| L1 | L9  | 9033 | 965a  | 8817 | Ndis | -0.0438 | 0.0110         | -3.9995 | 4.70E-03 |
| L1 | L9  | 9033 | 965BA | 8817 | Ndis | -0.0439 | 0.0107         | -4.1196 | 2.81E-03 |
| L1 | L10 | 9033 | CJ01  | 8817 | Ndis | 0.0978  | 0.0134         | 7.3088  | 2.00E-11 |
| L1 | L10 | 9033 | CJ03  | 8817 | Ndis | 0.0875  | 0.0178         | 4.8996  | 7.10E-05 |
| L1 | L10 | 9033 | CJ04  | 8817 | Ndis | 0.0838  | 0.0181         | 4.6413  | 2.56E-04 |
| L1 | L10 | 9033 | CJ05  | 8817 | Ndis | 0.0807  | 0.0200         | 4.0373  | 4.00E-03 |
| L1 | L10 | 9033 | CJ06  | 8817 | Ndis | 0.3841  | 0.0548         | 7.0115  | 1.75E-10 |
| L1 | L10 | 9033 | CJ08  | 8817 | Ndis | 0.0754  | 0.0153         | 4.9410  | 5.75E-05 |
| L1 | L10 | 9033 | CJ09  | 8817 | Ndis | 0.3805  | 0.0551         | 6.9114  | 3.55E-10 |
| L1 | L10 | 9033 | CJ10  | 8817 | Ndis | 0.0819  | 0.0186         | 4.4119  | 7.55E-04 |
| L1 | L10 | 9033 | CJ13  | 8817 | Ndis | 0.0691  | 0.0155         | 4.4521  | 6.29E-04 |
| L1 | L10 | 9033 | CJ14  | 8817 | Ndis | 0.0890  | 0.0137         | 6.4954  | 6.13E-09 |
| L1 | L10 | 9033 | CJ15  | 8817 | Ndis | 0.0911  | 0.0168         | 5.4154  | 4.53E-06 |
| L1 | L10 | 9033 | CJ16  | 8817 | Ndis | 0.3994  | 0.0550         | 7.2557  | 2.95E-11 |
| L1 | L10 | 9033 | CJ19  | 8817 | Ndis | 0.3898  | 0.0549         | 7.0944  | 9.62E-11 |
| L1 | L10 | 9033 | CJ20  | 8817 | Ndis | 0.0804  | 0.0191         | 4.2023  | 1.95E-03 |
| L1 | L10 | 9033 | CJ22  | 8817 | Ndis | 0.0825  | 0.0189         | 4.3730  | 9.10E-04 |
| L1 | L10 | 9033 | CJ23  | 8817 | Ndis | 0.0855  | 0.0190         | 4.4916  | 5.23E-04 |
| L1 | L10 | 9033 | CJ24  | 8817 | Ndis | 0.0697  | 0.0203         | 3.4342  | 4.40E-02 |
| L1 | L5  | 9033 | CJ25  | 8817 | Ndis | 0.0048  | 0.0120         | 0.3993  | 1.00E+00 |
| L1 | L5  | 9033 | CJ26  | 8817 | Ndis | 0.0037  | 0.0118         | 0.3169  | 1.00E+00 |
| L1 | L5  | 9033 | CJ27  | 8817 | Ndis | 0.0029  | 0.0116         | 0.2536  | 1.00E+00 |
| L1 | L5  | 9033 | CJ28  | 8817 | Ndis | 0.0025  | 0.0116         | 0.2141  | 1.00E+00 |
| L1 | L5  | 9033 | CJ29  | 8817 | Ndis | 0.0040  | 0.0121         | 0.3300  | 1.00E+00 |
| L1 | L5  | 9033 | CJ32  | 8817 | Ndis | 0.0047  | 0.0112         | 0.4232  | 1.00E+00 |
| L1 | L5  | 9033 | CJ33  | 8817 | Ndis | 0.0095  | 0.0122         | 0.7810  | 1.00E+00 |
| L1 | L5  | 9033 | CJ34  | 8817 | Ndis | 0.0101  | 0.0122         | 0.8257  | 1.00E+00 |
| L1 | L5  | 9033 | CJ36  | 8817 | Ndis | 0.0047  | 0.0111         | 0.4280  | 1.00E+00 |
| L1 | L5  | 9033 | CJ38  | 8817 | Ndis | 0.0050  | 0.0116         | 0.4292  | 1.00E+00 |
| L1 | L5  | 9033 | CJ40  | 8817 | Ndis | 0.0095  | 0.0115         | 0.8231  | 1.00E+00 |
| L1 | L5  | 9033 | CJ41  | 8817 | Ndis | 0.0045  | 0.0118         | 0.3859  | 1.00E+00 |



---

|    |    |      |      |      |      |        |        |        |          |
|----|----|------|------|------|------|--------|--------|--------|----------|
| L1 | L5 | 9033 | CJ42 | 8817 | Ndis | 0.0045 | 0.0116 | 0.3898 | 1.00E+00 |
| L1 | L5 | 9033 | CJ43 | 8817 | Ndis | 0.0034 | 0.0118 | 0.2890 | 1.00E+00 |
| L1 | L5 | 9033 | CJ44 | 8817 | Ndis | 0.0050 | 0.0116 | 0.4264 | 1.00E+00 |
| L1 | L5 | 9033 | CJ45 | 8817 | Ndis | 0.0101 | 0.0120 | 0.8423 | 1.00E+00 |
| L1 | L5 | 9033 | CJ46 | 8817 | Ndis | 0.0137 | 0.0120 | 1.1380 | 1.00E+00 |
| L1 | L5 | 9033 | CJ47 | 8817 | Ndis | 0.0046 | 0.0121 | 0.3826 | 1.00E+00 |
| L1 | L5 | 9033 | CJ49 | 8817 | Ndis | 0.0077 | 0.0118 | 0.6534 | 1.00E+00 |
| L1 | L5 | 9033 | CJ50 | 8817 | Ndis | 0.0069 | 0.0117 | 0.5901 | 1.00E+00 |
| L1 | L5 | 9033 | CJ51 | 8817 | Ndis | 0.0032 | 0.0111 | 0.2925 | 1.00E+00 |
| L1 | L1 | 9033 | CJ55 | 8817 | Ndis | 0.0047 | 0.0351 | 0.1325 | 1.00E+00 |
| L1 | L1 | 9033 | CJ56 | 8817 | Ndis | 0.0090 | 0.0336 | 0.2692 | 1.00E+00 |
| L1 | L8 | 9033 | CJ57 | 8817 | Ndis | 0.0744 | 0.0136 | 5.4648 | 3.43E-06 |
| L1 | L8 | 9033 | CJ58 | 8817 | Ndis | 0.0752 | 0.0136 | 5.5090 | 2.67E-06 |
| L1 | L8 | 9033 | CJ59 | 8817 | Ndis | 0.0695 | 0.0140 | 4.9563 | 5.32E-05 |
| L1 | L8 | 9033 | CJ60 | 8817 | Ndis | 0.0692 | 0.0138 | 5.0064 | 4.11E-05 |
| L1 | L8 | 9033 | CJ61 | 8817 | Ndis | 0.0767 | 0.0138 | 5.5539 | 2.06E-06 |
| L1 | L8 | 9033 | CJ62 | 8817 | Ndis | 0.0751 | 0.0137 | 5.4733 | 3.27E-06 |
| L1 | L8 | 9033 | CJ63 | 8817 | Ndis | 0.0739 | 0.0136 | 5.4466 | 3.80E-06 |
| L1 | L8 | 9033 | CJ64 | 8817 | Ndis | 0.0746 | 0.0136 | 5.4958 | 2.88E-06 |
| L1 | L8 | 9033 | CJ67 | 8817 | Ndis | 0.0675 | 0.0139 | 4.8413 | 9.55E-05 |
| L1 | L8 | 9033 | CJ68 | 8817 | Ndis | 0.0703 | 0.0139 | 5.0636 | 3.04E-05 |
| L1 | L7 | 9033 | CJ69 | 8817 | Ndis | 0.0461 | 0.0128 | 3.5924 | 2.42E-02 |
| L1 | L7 | 9033 | CJ70 | 8817 | Ndis | 0.0464 | 0.0129 | 3.5892 | 2.45E-02 |
| L1 | L8 | 9033 | CJ71 | 8817 | Ndis | 0.0717 | 0.0139 | 5.1469 | 1.96E-05 |
| L1 | L8 | 9033 | CJ72 | 8817 | Ndis | 0.0711 | 0.0140 | 5.0939 | 2.60E-05 |
| L1 | L7 | 9033 | CJ73 | 8817 | Ndis | 0.0939 | 0.0132 | 7.1346 | 7.19E-11 |
| L1 | L7 | 9033 | CJ74 | 8817 | Ndis | 0.0942 | 0.0132 | 7.1433 | 6.74E-11 |
| L1 | L8 | 9033 | CJ75 | 8817 | Ndis | 0.0688 | 0.0138 | 4.9772 | 4.77E-05 |
| L1 | L8 | 9033 | CJ76 | 8817 | Ndis | 0.0688 | 0.0139 | 4.9599 | 5.22E-05 |
| L1 | L8 | 9033 | CJ77 | 8817 | Ndis | 0.0759 | 0.0141 | 5.3998 | 4.94E-06 |
| L1 | L8 | 9033 | CJ78 | 8817 | Ndis | 0.0764 | 0.0141 | 5.4177 | 4.47E-06 |
| L1 | L8 | 9033 | CJ79 | 8817 | Ndis | 0.0735 | 0.0138 | 5.3392 | 6.91E-06 |
| L1 | L8 | 9033 | CJ80 | 8817 | Ndis | 0.0740 | 0.0137 | 5.4059 | 4.77E-06 |
| L1 | L7 | 9033 | CJ81 | 8817 | Ndis | 0.1007 | 0.0131 | 7.6911 | 1.09E-12 |
| L1 | L7 | 9033 | CJ82 | 8817 | Ndis | 0.1007 | 0.0131 | 7.7091 | 9.40E-13 |
| L1 | L7 | 9033 | CJ83 | 8817 | Ndis | 0.0982 | 0.0131 | 7.4945 | 4.93E-12 |
| L1 | L7 | 9033 | CJ84 | 8817 | Ndis | 0.0977 | 0.0131 | 7.4344 | 7.77E-12 |
| L1 | L8 | 9033 | CJ85 | 8817 | Ndis | 0.0752 | 0.0137 | 5.4898 | 2.97E-06 |
| L1 | L8 | 9033 | CJ86 | 8817 | Ndis | 0.0752 | 0.0138 | 5.4599 | 3.52E-06 |

---

**Supplementary Table 6.** Patterson's *D*-statistic (*D*), which measures excess of ABBA sites over BABA sites or vice versa, for the comparison of strain 9033 (P1) of L1 *N. tetrasperma* (L1 column), a single strain (P2) from each of the other seven lineages (L2 column) of *N. tetrasperma*, 1135 from *N. sitophila* (P3) and *N. discreta* as the outgroups (O). A significantly positive *D*-statistic supports introgression between *N. sitophila* and P2.

| L1 | L2  | P1   | P2    | P3   | O    | Dstat   | SE     | Z       | p-value  |
|----|-----|------|-------|------|------|---------|--------|---------|----------|
| L1 | L6  | 9033 | 2508  | 1135 | Ndis | 0.0743  | 0.0120 | 6.1768  | 4.84E-08 |
| L1 | L6  | 9033 | 2509  | 1135 | Ndis | 0.0772  | 0.0120 | 6.4369  | 9.03E-09 |
| L1 | L4  | 9033 | 7585  | 1135 | Ndis | -0.0437 | 0.0178 | -2.4548 | 1.00E+00 |
| L1 | L4  | 9033 | 7586  | 1135 | Ndis | -0.0439 | 0.0181 | -2.4307 | 1.00E+00 |
| L1 | L9  | 9033 | 965a  | 1135 | Ndis | -0.0099 | 0.0121 | -0.8207 | 1.00E+00 |
| L1 | L9  | 9033 | 965BA | 1135 | Ndis | -0.0103 | 0.0122 | -0.8431 | 1.00E+00 |
| L1 | L10 | 9033 | CJ01  | 1135 | Ndis | -0.0410 | 0.0112 | -3.6506 | 1.94E-02 |
| L1 | L10 | 9033 | CJ03  | 1135 | Ndis | -0.0612 | 0.0185 | -3.3099 | 6.91E-02 |
| L1 | L10 | 9033 | CJ04  | 1135 | Ndis | -0.0604 | 0.0176 | -3.4383 | 4.33E-02 |
| L1 | L10 | 9033 | CJ05  | 1135 | Ndis | -0.0341 | 0.0230 | -1.4850 | 1.00E+00 |
| L1 | L10 | 9033 | CJ06  | 1135 | Ndis | -0.1824 | 0.0307 | -5.9503 | 1.98E-07 |
| L1 | L10 | 9033 | CJ08  | 1135 | Ndis | -0.0328 | 0.0180 | -1.8247 | 1.00E+00 |
| L1 | L10 | 9033 | CJ09  | 1135 | Ndis | -0.1590 | 0.0342 | -4.6430 | 2.54E-04 |
| L1 | L10 | 9033 | CJ10  | 1135 | Ndis | -0.0341 | 0.0224 | -1.5231 | 1.00E+00 |
| L1 | L10 | 9033 | CJ13  | 1135 | Ndis | -0.0196 | 0.0164 | -1.1976 | 1.00E+00 |
| L1 | L10 | 9033 | CJ14  | 1135 | Ndis | -0.0368 | 0.0111 | -3.3117 | 6.86E-02 |
| L1 | L10 | 9033 | CJ15  | 1135 | Ndis | -0.0629 | 0.0191 | -3.2861 | 7.52E-02 |
| L1 | L10 | 9033 | CJ16  | 1135 | Ndis | -0.1568 | 0.0365 | -4.2982 | 1.27E-03 |
| L1 | L10 | 9033 | CJ19  | 1135 | Ndis | -0.1637 | 0.0358 | -4.5735 | 3.55E-04 |
| L1 | L10 | 9033 | CJ20  | 1135 | Ndis | -0.0317 | 0.0228 | -1.3891 | 1.00E+00 |
| L1 | L10 | 9033 | CJ22  | 1135 | Ndis | -0.0661 | 0.0189 | -3.4906 | 3.57E-02 |
| L1 | L10 | 9033 | CJ23  | 1135 | Ndis | -0.0623 | 0.0191 | -3.2621 | 8.18E-02 |
| L1 | L10 | 9033 | CJ24  | 1135 | Ndis | -0.0360 | 0.0227 | -1.5872 | 1.00E+00 |
| L1 | L5  | 9033 | CJ25  | 1135 | Ndis | 0.0459  | 0.0120 | 3.8115  | 1.02E-02 |
| L1 | L5  | 9033 | CJ26  | 1135 | Ndis | 0.0447  | 0.0121 | 3.6809  | 1.72E-02 |
| L1 | L5  | 9033 | CJ27  | 1135 | Ndis | 0.0450  | 0.0121 | 3.7095  | 1.54E-02 |
| L1 | L5  | 9033 | CJ28  | 1135 | Ndis | 0.0450  | 0.0121 | 3.7328  | 1.40E-02 |
| L1 | L5  | 9033 | CJ29  | 1135 | Ndis | 0.0435  | 0.0123 | 3.5393  | 2.97E-02 |
| L1 | L5  | 9033 | CJ32  | 1135 | Ndis | 0.0425  | 0.0121 | 3.5224  | 3.16E-02 |
| L1 | L5  | 9033 | CJ33  | 1135 | Ndis | 0.0487  | 0.0118 | 4.1148  | 2.87E-03 |
| L1 | L5  | 9033 | CJ34  | 1135 | Ndis | 0.0487  | 0.0119 | 4.1039  | 3.00E-03 |
| L1 | L5  | 9033 | CJ36  | 1135 | Ndis | 0.0422  | 0.0120 | 3.5104  | 3.31E-02 |
| L1 | L5  | 9033 | CJ38  | 1135 | Ndis | 0.0468  | 0.0117 | 4.0168  | 4.37E-03 |
| L1 | L5  | 9033 | CJ40  | 1135 | Ndis | 0.0420  | 0.0122 | 3.4455  | 4.22E-02 |
| L1 | L5  | 9033 | CJ41  | 1135 | Ndis | 0.0448  | 0.0121 | 3.7149  | 1.50E-02 |

---

|    |    |      |      |      |      |         |        |         |          |
|----|----|------|------|------|------|---------|--------|---------|----------|
| L1 | L5 | 9033 | CJ42 | 1135 | Ndis | 0.0460  | 0.0120 | 3.8217  | 9.81E-03 |
| L1 | L5 | 9033 | CJ43 | 1135 | Ndis | 0.0416  | 0.0121 | 3.4377  | 4.34E-02 |
| L1 | L5 | 9033 | CJ44 | 1135 | Ndis | 0.0421  | 0.0120 | 3.5005  | 3.44E-02 |
| L1 | L5 | 9033 | CJ45 | 1135 | Ndis | 0.0447  | 0.0121 | 3.6881  | 1.67E-02 |
| L1 | L5 | 9033 | CJ46 | 1135 | Ndis | 0.0478  | 0.0123 | 3.8905  | 7.40E-03 |
| L1 | L5 | 9033 | CJ47 | 1135 | Ndis | 0.0452  | 0.0121 | 3.7319  | 1.41E-02 |
| L1 | L5 | 9033 | CJ49 | 1135 | Ndis | 0.0477  | 0.0119 | 3.9960  | 4.77E-03 |
| L1 | L5 | 9033 | CJ50 | 1135 | Ndis | 0.0469  | 0.0120 | 3.9061  | 6.94E-03 |
| L1 | L5 | 9033 | CJ51 | 1135 | Ndis | 0.0452  | 0.0120 | 3.7670  | 1.22E-02 |
| L1 | L1 | 9033 | CJ55 | 1135 | Ndis | -0.0102 | 0.0360 | -0.2827 | 1.00E+00 |
| L1 | L1 | 9033 | CJ56 | 1135 | Ndis | -0.0143 | 0.0354 | -0.4045 | 1.00E+00 |
| L1 | L8 | 9033 | CJ57 | 1135 | Ndis | 0.0022  | 0.0177 | 0.1242  | 1.00E+00 |
| L1 | L8 | 9033 | CJ58 | 1135 | Ndis | 0.0028  | 0.0178 | 0.1575  | 1.00E+00 |
| L1 | L8 | 9033 | CJ59 | 1135 | Ndis | 0.0023  | 0.0176 | 0.1316  | 1.00E+00 |
| L1 | L8 | 9033 | CJ60 | 1135 | Ndis | 0.0010  | 0.0176 | 0.0572  | 1.00E+00 |
| L1 | L8 | 9033 | CJ61 | 1135 | Ndis | 0.0013  | 0.0178 | 0.0704  | 1.00E+00 |
| L1 | L8 | 9033 | CJ62 | 1135 | Ndis | 0.0000  | 0.0178 | 0.0000  | 1.00E+00 |
| L1 | L8 | 9033 | CJ63 | 1135 | Ndis | 0.0075  | 0.0175 | 0.4262  | 1.00E+00 |
| L1 | L8 | 9033 | CJ64 | 1135 | Ndis | 0.0090  | 0.0175 | 0.5138  | 1.00E+00 |
| L1 | L8 | 9033 | CJ67 | 1135 | Ndis | 0.0010  | 0.0178 | 0.0553  | 1.00E+00 |
| L1 | L8 | 9033 | CJ68 | 1135 | Ndis | 0.0032  | 0.0177 | 0.1787  | 1.00E+00 |
| L1 | L7 | 9033 | CJ69 | 1135 | Ndis | -0.1516 | 0.0191 | -7.9488 | 1.32E-13 |
| L1 | L7 | 9033 | CJ70 | 1135 | Ndis | -0.1520 | 0.0190 | -8.0117 | 8.21E-14 |
| L1 | L8 | 9033 | CJ71 | 1135 | Ndis | 0.0042  | 0.0175 | 0.2422  | 1.00E+00 |
| L1 | L8 | 9033 | CJ72 | 1135 | Ndis | 0.0032  | 0.0175 | 0.1820  | 1.00E+00 |
| L1 | L7 | 9033 | CJ73 | 1135 | Ndis | -0.0936 | 0.0180 | -5.1894 | 1.56E-05 |
| L1 | L7 | 9033 | CJ74 | 1135 | Ndis | -0.0936 | 0.0180 | -5.1854 | 1.60E-05 |
| L1 | L8 | 9033 | CJ75 | 1135 | Ndis | 0.0011  | 0.0177 | 0.0605  | 1.00E+00 |
| L1 | L8 | 9033 | CJ76 | 1135 | Ndis | 0.0008  | 0.0176 | 0.0454  | 1.00E+00 |
| L1 | L8 | 9033 | CJ77 | 1135 | Ndis | 0.0035  | 0.0180 | 0.1970  | 1.00E+00 |
| L1 | L8 | 9033 | CJ78 | 1135 | Ndis | 0.0033  | 0.0179 | 0.1843  | 1.00E+00 |
| L1 | L8 | 9033 | CJ79 | 1135 | Ndis | 0.0059  | 0.0178 | 0.3298  | 1.00E+00 |
| L1 | L8 | 9033 | CJ80 | 1135 | Ndis | 0.0063  | 0.0179 | 0.3548  | 1.00E+00 |
| L1 | L7 | 9033 | CJ81 | 1135 | Ndis | -0.0940 | 0.0181 | -5.2042 | 1.44E-05 |
| L1 | L7 | 9033 | CJ82 | 1135 | Ndis | -0.0942 | 0.0180 | -5.2300 | 1.25E-05 |
| L1 | L7 | 9033 | CJ83 | 1135 | Ndis | -0.0946 | 0.0180 | -5.2687 | 1.01E-05 |
| L1 | L7 | 9033 | CJ84 | 1135 | Ndis | -0.0943 | 0.0179 | -5.2668 | 1.03E-05 |
| L1 | L8 | 9033 | CJ85 | 1135 | Ndis | 0.0042  | 0.0178 | 0.2368  | 1.00E+00 |
| L1 | L8 | 9033 | CJ86 | 1135 | Ndis | 0.0053  | 0.0177 | 0.2962  | 1.00E+00 |

---

**Supplementary Table 7.** Patterson's *D*-statistic (*D*), which measures excess of ABBA sites over BABA sites or vice versa, for the comparison of strain 9033 (P1) of L1 *N. tetrasperma* (L1 column), a single strain (P2) from each of the other seven lineages (L2 column) of *N. tetrasperma*, from *N. crassa* (P3) and *N. discreta* as the outgroups (O). A significantly positive *D*-statistic supports introgression between *N. crassa* and P2.

| L1 | L2  | P1   | P2    | P3   | O    | Dstat   | SE     | Z       | p-value  |
|----|-----|------|-------|------|------|---------|--------|---------|----------|
| L1 | L6  | 9033 | 2508  | Ncra | Ndis | -0.0027 | 0.0076 | -0.3536 | 1.00E+00 |
| L1 | L6  | 9033 | 2509  | Ncra | Ndis | -0.0024 | 0.0076 | -0.3112 | 1.00E+00 |
| L1 | L4  | 9033 | 7585  | Ncra | Ndis | -0.0219 | 0.0072 | -3.0510 | 1.00E+00 |
| L1 | L4  | 9033 | 7586  | Ncra | Ndis | -0.0217 | 0.0071 | -3.0434 | 1.00E+00 |
| L1 | L9  | 9033 | 965a  | Ncra | Ndis | -0.0049 | 0.0066 | -0.7334 | 1.00E+00 |
| L1 | L9  | 9033 | 965BA | Ncra | Ndis | -0.0045 | 0.0065 | -0.6820 | 1.00E+00 |
| L1 | L10 | 9033 | CJ01  | Ncra | Ndis | 0.0093  | 0.0068 | 1.3538  | 1.00E+00 |
| L1 | L10 | 9033 | CJ03  | Ncra | Ndis | 0.0007  | 0.0072 | 0.0973  | 1.00E+00 |
| L1 | L10 | 9033 | CJ04  | Ncra | Ndis | 0.0015  | 0.0073 | 0.2096  | 1.00E+00 |
| L1 | L10 | 9033 | CJ05  | Ncra | Ndis | 0.0000  | 0.0077 | -0.0051 | 1.00E+00 |
| L1 | L10 | 9033 | CJ06  | Ncra | Ndis | -0.0075 | 0.0077 | -0.9645 | 1.00E+00 |
| L1 | L10 | 9033 | CJ08  | Ncra | Ndis | -0.0024 | 0.0059 | -0.3976 | 1.00E+00 |
| L1 | L10 | 9033 | CJ09  | Ncra | Ndis | -0.0088 | 0.0077 | -1.1401 | 1.00E+00 |
| L1 | L10 | 9033 | CJ10  | Ncra | Ndis | 0.0006  | 0.0071 | 0.0914  | 1.00E+00 |
| L1 | L10 | 9033 | CJ13  | Ncra | Ndis | 0.0051  | 0.0066 | 0.7662  | 1.00E+00 |
| L1 | L10 | 9033 | CJ14  | Ncra | Ndis | 0.0012  | 0.0063 | 0.1903  | 1.00E+00 |
| L1 | L10 | 9033 | CJ15  | Ncra | Ndis | 0.0111  | 0.0073 | 1.5131  | 1.00E+00 |
| L1 | L10 | 9033 | CJ16  | Ncra | Ndis | -0.0137 | 0.0077 | -1.7877 | 1.00E+00 |
| L1 | L10 | 9033 | CJ19  | Ncra | Ndis | -0.0150 | 0.0075 | -1.9880 | 1.00E+00 |
| L1 | L10 | 9033 | CJ20  | Ncra | Ndis | -0.0014 | 0.0073 | -0.1903 | 1.00E+00 |
| L1 | L10 | 9033 | CJ22  | Ncra | Ndis | -0.0027 | 0.0080 | -0.3365 | 1.00E+00 |
| L1 | L10 | 9033 | CJ23  | Ncra | Ndis | -0.0009 | 0.0077 | -0.1143 | 1.00E+00 |
| L1 | L10 | 9033 | CJ24  | Ncra | Ndis | -0.0001 | 0.0076 | -0.0147 | 1.00E+00 |
| L1 | L5  | 9033 | CJ25  | Ncra | Ndis | 0.0106  | 0.0070 | 1.5050  | 1.00E+00 |
| L1 | L5  | 9033 | CJ26  | Ncra | Ndis | 0.0098  | 0.0069 | 1.4299  | 1.00E+00 |
| L1 | L5  | 9033 | CJ27  | Ncra | Ndis | 0.0083  | 0.0067 | 1.2372  | 1.00E+00 |
| L1 | L5  | 9033 | CJ28  | Ncra | Ndis | 0.0086  | 0.0067 | 1.2789  | 1.00E+00 |
| L1 | L5  | 9033 | CJ29  | Ncra | Ndis | 0.0092  | 0.0069 | 1.3346  | 1.00E+00 |
| L1 | L5  | 9033 | CJ32  | Ncra | Ndis | 0.0086  | 0.0066 | 1.2981  | 1.00E+00 |
| L1 | L5  | 9033 | CJ33  | Ncra | Ndis | 0.0091  | 0.0071 | 1.2871  | 1.00E+00 |
| L1 | L5  | 9033 | CJ34  | Ncra | Ndis | 0.0099  | 0.0070 | 1.4062  | 1.00E+00 |
| L1 | L5  | 9033 | CJ38  | Ncra | Ndis | 0.0062  | 0.0070 | 0.8864  | 1.00E+00 |
| L1 | L5  | 9033 | CJ40  | Ncra | Ndis | 0.0057  | 0.0070 | 0.8099  | 1.00E+00 |
| L1 | L5  | 9033 | CJ41  | Ncra | Ndis | 0.0089  | 0.0067 | 1.3328  | 1.00E+00 |
| L1 | L5  | 9033 | CJ42  | Ncra | Ndis | 0.0086  | 0.0068 | 1.2526  | 1.00E+00 |

|    |    |      |      |      |      |         |        |         |          |
|----|----|------|------|------|------|---------|--------|---------|----------|
| L1 | L5 | 9033 | CJ43 | Ncra | Ndis | 0.0046  | 0.0071 | 0.6437  | 1.00E+00 |
| L1 | L5 | 9033 | CJ44 | Ncra | Ndis | 0.0050  | 0.0070 | 0.7072  | 1.00E+00 |
| L1 | L5 | 9033 | CJ45 | Ncra | Ndis | 0.0066  | 0.0069 | 0.9576  | 1.00E+00 |
| L1 | L5 | 9033 | CJ46 | Ncra | Ndis | 0.0063  | 0.0068 | 0.9224  | 1.00E+00 |
| L1 | L5 | 9033 | CJ47 | Ncra | Ndis | 0.0076  | 0.0072 | 1.0500  | 1.00E+00 |
| L1 | L5 | 9033 | CJ49 | Ncra | Ndis | 0.0053  | 0.0070 | 0.7640  | 1.00E+00 |
| L1 | L5 | 9033 | CJ50 | Ncra | Ndis | 0.0034  | 0.0069 | 0.4962  | 1.00E+00 |
| L1 | L1 | 9033 | CJ55 | Ncra | Ndis | 0.0112  | 0.0203 | 0.5499  | 1.00E+00 |
| L1 | L1 | 9033 | CJ56 | Ncra | Ndis | 0.0103  | 0.0191 | 0.5385  | 1.00E+00 |
| L1 | L8 | 9033 | CJ57 | Ncra | Ndis | 0.0021  | 0.0066 | 0.3226  | 1.00E+00 |
| L1 | L8 | 9033 | CJ58 | Ncra | Ndis | 0.0021  | 0.0066 | 0.3185  | 1.00E+00 |
| L1 | L8 | 9033 | CJ59 | Ncra | Ndis | 0.0002  | 0.0066 | 0.0327  | 1.00E+00 |
| L1 | L8 | 9033 | CJ60 | Ncra | Ndis | -0.0005 | 0.0066 | -0.0813 | 1.00E+00 |
| L1 | L8 | 9033 | CJ61 | Ncra | Ndis | -0.0021 | 0.0067 | -0.3146 | 1.00E+00 |
| L1 | L8 | 9033 | CJ62 | Ncra | Ndis | -0.0039 | 0.0068 | -0.5795 | 1.00E+00 |
| L1 | L8 | 9033 | CJ63 | Ncra | Ndis | 0.0029  | 0.0063 | 0.4685  | 1.00E+00 |
| L1 | L8 | 9033 | CJ64 | Ncra | Ndis | 0.0029  | 0.0063 | 0.4578  | 1.00E+00 |
| L1 | L8 | 9033 | CJ67 | Ncra | Ndis | -0.0017 | 0.0067 | -0.2529 | 1.00E+00 |
| L1 | L8 | 9033 | CJ68 | Ncra | Ndis | -0.0019 | 0.0068 | -0.2714 | 1.00E+00 |
| L1 | L7 | 9033 | CJ69 | Ncra | Ndis | -0.0119 | 0.0072 | -1.6629 | 1.00E+00 |
| L1 | L7 | 9033 | CJ70 | Ncra | Ndis | -0.0119 | 0.0071 | -1.6687 | 1.00E+00 |
| L1 | L8 | 9033 | CJ71 | Ncra | Ndis | 0.0022  | 0.0064 | 0.3409  | 1.00E+00 |
| L1 | L8 | 9033 | CJ72 | Ncra | Ndis | 0.0022  | 0.0065 | 0.3303  | 1.00E+00 |
| L1 | L7 | 9033 | CJ73 | Ncra | Ndis | -0.0007 | 0.0072 | -0.1024 | 1.00E+00 |
| L1 | L7 | 9033 | CJ74 | Ncra | Ndis | -0.0013 | 0.0071 | -0.1864 | 1.00E+00 |
| L1 | L8 | 9033 | CJ75 | Ncra | Ndis | -0.0012 | 0.0067 | -0.1825 | 1.00E+00 |
| L1 | L8 | 9033 | CJ76 | Ncra | Ndis | -0.0013 | 0.0066 | -0.1917 | 1.00E+00 |
| L1 | L8 | 9033 | CJ77 | Ncra | Ndis | -0.0015 | 0.0068 | -0.2243 | 1.00E+00 |
| L1 | L8 | 9033 | CJ78 | Ncra | Ndis | -0.0012 | 0.0068 | -0.1741 | 1.00E+00 |
| L1 | L8 | 9033 | CJ79 | Ncra | Ndis | 0.0010  | 0.0066 | 0.1474  | 1.00E+00 |
| L1 | L8 | 9033 | CJ80 | Ncra | Ndis | 0.0012  | 0.0065 | 0.1844  | 1.00E+00 |
| L1 | L7 | 9033 | CJ81 | Ncra | Ndis | 0.0000  | 0.0069 | 0.0053  | 1.00E+00 |
| L1 | L7 | 9033 | CJ82 | Ncra | Ndis | 0.0005  | 0.0068 | 0.0696  | 1.00E+00 |
| L1 | L7 | 9033 | CJ83 | Ncra | Ndis | 0.0003  | 0.0069 | 0.0422  | 1.00E+00 |
| L1 | L7 | 9033 | CJ84 | Ncra | Ndis | 0.0007  | 0.0068 | 0.1080  | 1.00E+00 |
| L1 | L8 | 9033 | CJ85 | Ncra | Ndis | 0.0001  | 0.0067 | 0.0217  | 1.00E+00 |
| L1 | L8 | 9033 | CJ86 | Ncra | Ndis | 0.0013  | 0.0066 | 0.1908  | 1.00E+00 |

---

**Supplementary Table 8** Maximum likelihood estimates of parameters under Model M1 and the likelihood ratio test statistic ( $2\Delta l$ ) between M1 (model with gene flow) and M0 (isolation model) for species divergence between lineages of *N. tetrasperma* and heterothallics species. Parameters  $\theta$  and  $\tau$  are scaled by 100.

| Species Triplet                         | Loci | $2\Delta l^1$ | M0         |            |          |          | M1         |            |          |          |
|-----------------------------------------|------|---------------|------------|------------|----------|----------|------------|------------|----------|----------|
|                                         |      |               | $\theta_4$ | $\theta_5$ | $\tau_0$ | $\tau_1$ | $\theta_4$ | $\theta_5$ | $\tau_0$ | $\tau_1$ |
| <b>((1,2),Outgroup)</b>                 |      |               |            |            |          |          |            |            |          |          |
| ((L1, <i>N. sit</i> ), <i>N. dis</i> )  | 719  | <b>19.23</b>  | 7.06       | 1.25       | 4.32     | 0.76     | 7.11       | 1.11       | 4.11     | 0.64     |
| ((L4, <i>N. sit</i> ), <i>N. dis</i> )  | 725  | <b>13.48</b>  | 7.17       | 1.25       | 4.32     | 0.81     | 6.92       | 1.22       | 4.16     | 0.63     |
| ((L5, <i>N. sit</i> ), <i>N. dis</i> )  | 713  | <b>16.33</b>  | 7.37       | 1.45       | 4.33     | 0.75     | 7.19       | 1.24       | 4.19     | 0.64     |
| ((L6, <i>N. sit</i> ), <i>N. dis</i> )  | 728  | <b>10.86</b>  | 7.55       | 1.88       | 4.33     | 0.81     | 7.40       | 1.04       | 4.18     | 0.83     |
| ((L7, <i>N. sit</i> ), <i>N. dis</i> )  | 732  | <b>4.50</b>   | 7.02       | 1.28       | 4.30     | 0.80     | 6.99       | 1.25       | 4.20     | 0.64     |
| ((L8, <i>N. sit</i> ), <i>N. dis</i> )  | 710  | <b>11.72</b>  | 7.08       | 1.25       | 4.26     | 0.75     | 7.95       | 1.52       | 4.15     | 0.79     |
| ((L9, <i>N. sit</i> ), <i>N. dis</i> )  | 712  | <b>10.19</b>  | 7.16       | 1.25       | 4.34     | 0.79     | 6.97       | 1.23       | 4.23     | 0.68     |
| ((L10, <i>N. sit</i> ), <i>N. dis</i> ) | 719  | <b>11.00</b>  | 7.07       | 1.43       | 4.35     | 0.73     | 7.54       | 0.95       | 4.12     | 0.73     |
| ((L1, <i>N. his</i> ), <i>N. dis</i> )  | 719  | <b>4.92</b>   | 6.97       | 1.45       | 4.20     | 0.54     | 7.04       | 1.14       | 4.29     | 0.88     |
| ((L4, <i>N. his</i> ), <i>N. dis</i> )  | 714  | <b>13.86</b>  | 7.17       | 1.56       | 4.20     | 0.48     | 7.59       | 1.58       | 4.31     | 0.96     |
| ((L5, <i>N. his</i> ), <i>N. dis</i> )  | 732  | <b>20.92</b>  | 7.31       | 1.70       | 4.21     | 0.50     | 7.12       | 1.00       | 4.24     | 0.87     |
| ((L6, <i>N. his</i> ), <i>N. dis</i> )  | 737  | <b>20.46</b>  | 7.90       | 1.98       | 4.17     | 0.57     | 7.20       | 0.90       | 4.30     | 0.99     |
| ((L7, <i>N. his</i> ), <i>N. dis</i> )  | 705  | <b>13.90</b>  | 6.90       | 1.53       | 4.17     | 0.47     | 7.11       | 0.84       | 4.30     | 0.96     |
| ((L8, <i>N. his</i> ), <i>N. dis</i> )  | 712  | <b>13.19</b>  | 7.09       | 1.52       | 4.12     | 0.44     | 7.20       | 1.00       | 4.33     | 0.91     |
| ((L9, <i>N. his</i> ), <i>N. dis</i> )  | 714  | <b>7.49</b>   | 6.95       | 1.49       | 4.24     | 0.55     | 7.10       | 1.06       | 4.33     | 0.92     |
| ((L10, <i>N. his</i> ), <i>N. dis</i> ) | 719  | <b>31.10</b>  | 7.46       | 1.70       | 4.14     | 0.36     | 7.41       | 0.96       | 4.30     | 0.99     |
| ((L1, <i>N. cra</i> ), <i>N. dis</i> )  | 772  | <b>5.86</b>   | 7.45       | 2.96       | 4.64     | 0.97     | 6.96       | 2.65       | 4.66     | 1.09     |
| ((L4, <i>N. cra</i> ), <i>N. dis</i> )  | 756  | <b>5.04</b>   | 6.93       | 2.87       | 4.67     | 0.99     | 8.14       | 3.55       | 4.63     | 1.03     |
| ((L5, <i>N. cra</i> ), <i>N. dis</i> )  | 786  | 2.11          | 7.99       | 3.31       | 4.63     | 1.00     | 8.02       | 3.19       | 4.63     | 1.05     |
| ((L6, <i>N. cra</i> ), <i>N. dis</i> )  | 796  | 1.44          | 8.12       | 3.69       | 4.64     | 0.97     | 7.42       | 2.86       | 4.56     | 0.96     |
| ((L7, <i>N. cra</i> ), <i>N. dis</i> )  | 756  | 0.05          | 7.41       | 2.88       | 4.57     | 0.96     | 7.76       | 2.98       | 4.59     | 1.01     |
| ((L8, <i>N. cra</i> ), <i>N. dis</i> )  | 761  | 1.27          | 7.15       | 2.86       | 4.60     | 0.97     | 7.16       | 2.76       | 4.59     | 1.01     |
| ((L9, <i>N. cra</i> ), <i>N. dis</i> )  | 769  | <b>2.77</b>   | 7.67       | 3.03       | 4.61     | 1.00     | 7.51       | 2.74       | 4.62     | 1.08     |
| ((L10, <i>N. cra</i> ), <i>N. dis</i> ) | 773  | 2.37          | 7.73       | 3.14       | 4.60     | 0.94     | 7.70       | 2.89       | 4.60     | 1.06     |

<sup>1</sup>Statistically significant results are in bold (5% critical value 2.71 (Yang 2010))

**Supplementary Table 9.** Counts of synonymous polymorphisms (S) to non-synonymous polymorphisms (N) in recombining (R) and non-recombining region (SR) of *N. tetrasperma*.

| Lineage  | Polymorphism type | Region |       | <i>P</i> -value |
|----------|-------------------|--------|-------|-----------------|
|          |                   | SR A   | R     |                 |
| L5 (NZ)  | N                 | 766    | 11522 | 2.2e-16         |
|          | S                 | 960    | 25147 |                 |
| L8 (LA)  | N                 | 791    | 5699  | 2.2e-16         |
|          | S                 | 782    | 11046 |                 |
| L10 (UK) | N                 | 103    | 20997 | 1.73e-07        |
|          | S                 | 131    | 54043 |                 |
|          |                   | SR a   | R     |                 |
| L5 (NZ)  | N                 | 797    | 11522 | 2.2e-16         |
|          | S                 | 835    | 25147 |                 |
| L8 (LA)  | N                 | 120    | 5699  | 7.063e-10       |
|          | S                 | 100    | 11046 |                 |
| L10 (UK) | N                 | 115    | 20997 | 2.2e-16         |
|          | S                 | 85     | 54043 |                 |
|          |                   | SR A   | SR a  |                 |
| L5 (NZ)  | N                 | 766    | 797   | 0.01043         |
|          | S                 | 960    | 835   |                 |
| L8 (LA)  | N                 | 791    | 120   | 0.2497          |
|          | S                 | 782    | 100   |                 |
| L10 (UK) | N                 | 103    | 115   | 0.005344        |
|          | S                 | 131    | 85    |                 |

**Supplementary Table 10.** The median  $d_N/d_S$  values for 1133 genes within the *mat* chromosome SR region common to all lineages of *N. tetrasperma*. The p-value was obtained from a one-sided Mann-Whitney U test (MWU) for L5, L7, L9 and L10. A two-sided MWU test was used with L1 and L8.

| Lineage <sup>1</sup> | Median $d_N/d_S$ <sup>2</sup> |              | P-value   |
|----------------------|-------------------------------|--------------|-----------|
|                      | <i>mat A</i>                  | <i>mat a</i> |           |
| L1 (LA)              | 0.121                         | 0.125        | 0.9028    |
| L5 (NZ) <sup>3</sup> | <b>0.094</b>                  | 0.119        | 0.03645   |
| L7 (LA)              | 0.135                         | <b>0.118</b> | 0.055     |
| L8 (LA)              | 0.131                         | 0.129        | 0.9138    |
| L9 (LB)              | 0.137                         | <b>0.103</b> | 0.0007221 |
| L10 (UK)             | <b>0.095</b>                  | 0.119        | 0.008701  |

<sup>1</sup> Lineages L4, L5a and L6 were excluded from the analyses due to low divergence with other lineages.

<sup>2</sup> The  $d_N/d_S$  values marked in bold indicate the introgressed *mat* chromosome for the lineage being considered.

<sup>3</sup> Values used here from the L10 *mat a* branch.



**Supplementary Table 11.** Numbers of synonymous substitution in the SR region. Substitutions were categorized as optimal or non-optimal. Counts of synonymous substitutions resulting in switches from optimal to non-optimal codons (*OP* → *NOP*) and non-optimal to optimal codons (*NOP* → *OP*) were determined as described in the methods section. Neutral substitutions include *OP* → *OP* and *NOP* → *NOP* switches.

| Lineage         | Synonymous substitutions            | <i>mat A</i> | <i>mat a</i> | Ratio | P-value       |
|-----------------|-------------------------------------|--------------|--------------|-------|---------------|
| <b>L1 (LA)</b>  | <i>OP</i> → <i>NOP</i> <sup>1</sup> | 1719         | 1566         | 1.10  | 0.54 (FET)    |
|                 | <i>NOP</i> → <i>OP</i> <sup>1</sup> | 1025         | 968          | 1.06  | 0.23 (FET)    |
|                 | Neutral <sup>2</sup>                | 2677         | 2371         | 1.13  | <0.0001 (ST)  |
| <b>L4 (MX)</b>  | <i>OP</i> → <i>NOP</i>              | 2253         | 2148         | 1.05  | 0.03 (FET)    |
|                 | <i>NOP</i> → <i>OP</i>              | 1268         | 1260         | 1.01  | 0.74 (FET)    |
|                 | Neutral                             | 3309         | 3383         | 0.98  | 0.37 (ST)     |
| <b>L5 (NZ)</b>  | <i>OP</i> → <i>NOP</i>              | 3212         | 3097         | 1.04  | 0.26 (FET)    |
|                 | <i>NOP</i> → <i>OP</i>              | 2035         | 1823         | 1.12  | 0.09 (FET)    |
|                 | Neutral                             | 4975         | 4698         | 1.06  | 0.005 (ST)    |
| <b>L6 (HI)</b>  | <i>OP</i> → <i>NOP</i>              | 3606         | 3496         | 1.03  | 0.82 (FET)    |
|                 | <i>NOP</i> → <i>OP</i>              | 2311         | 2095         | 1.11  | 0.004 (FET)   |
|                 | Neutral                             | 5307         | 5291         | 1.00  | 0.88 (ST)     |
| <b>L7 (LA)</b>  | <i>OP</i> → <i>NOP</i>              | 1950         | 2086         | 0.93  | 0.55 (FET)    |
|                 | <i>NOP</i> → <i>OP</i>              | 1119         | 1194         | 0.94  | 0.49 (FET)    |
|                 | Neutral                             | 2972         | 3164         | 0.94  | 0.0002 (ST)   |
| <b>L8 (LA)</b>  | <i>OP</i> → <i>NOP</i>              | 1636         | 1814         | 0.90  | 0.44 (FET)    |
|                 | <i>NOP</i> → <i>OP</i>              | 935          | 997          | 0.94  | 0.93 (FET)    |
|                 | Neutral                             | 2536         | 2718         | 0.94  | 0.01 (ST)     |
| <b>L9 (LB)</b>  | <i>OP</i> → <i>NOP</i>              | 3145         | 3833         | 0.82  | 0.10 (FET)    |
|                 | <i>NOP</i> → <i>OP</i>              | 1761         | 2567         | 0.69  | <0.0001 (FET) |
|                 | Neutral                             | 4779         | 6064         | 0.79  | 0.009 (ST)    |
| <b>L10 (UK)</b> | <i>OP</i> → <i>NOP</i>              | 2557         | 2520         | 1.01  | 0.35 (FET)    |
|                 | <i>NOP</i> → <i>OP</i>              | 1507         | 1439         | 1.05  | 0.35 (FET)    |
|                 | Neutral                             | 3940         | 3827         | 1.04  | 0.20 (ST)     |

<sup>1</sup> Statistical significance differences in *OP* → *NOP* and *NOP* → *OP* was determined using a Fisher's Exact test (FET) with a contingency table containing the *OP* → *NOP* and Neutral, or *NOP* → *OP* and Neutral. Statistical significance differences between Neutral synonymous substitutions was determined using a sign test (ST).

**Supplementary Table 12.** Information on genes from the SR and PAR region shared by all *N. tetrasperma* lineages sequenced and the heterothallic species used for the phylogenetic analysis presented in Fig 5.

| <b>Gene</b>   | <b>Region</b> | <b>Alignment Length (bp)</b> |
|---------------|---------------|------------------------------|
| <i>ad-9*</i>  | SR            | 693                          |
| <i>al-1*</i>  | SR            | 839                          |
| <i>arg-1*</i> | SR            | 1646                         |
| <i>cys-9</i>  | SR            | 1050                         |
| <i>eth-1</i>  | SR            | 982                          |
| <i>lys-4*</i> | SR            | 777                          |
| <i>phr</i>    | PAR           | 1917                         |
| <i>ro-10*</i> | PAR           | 662                          |

\*New gene sequence data for heterothallic species not represented in Sun *et al.* (2012)
